# Supplementary material
Source: Springer Nature journal article supplement (https://www.springermedizin.de/resource/supplementary/12879_2010_1375_MOESM1_ESM.pdf/9443094)

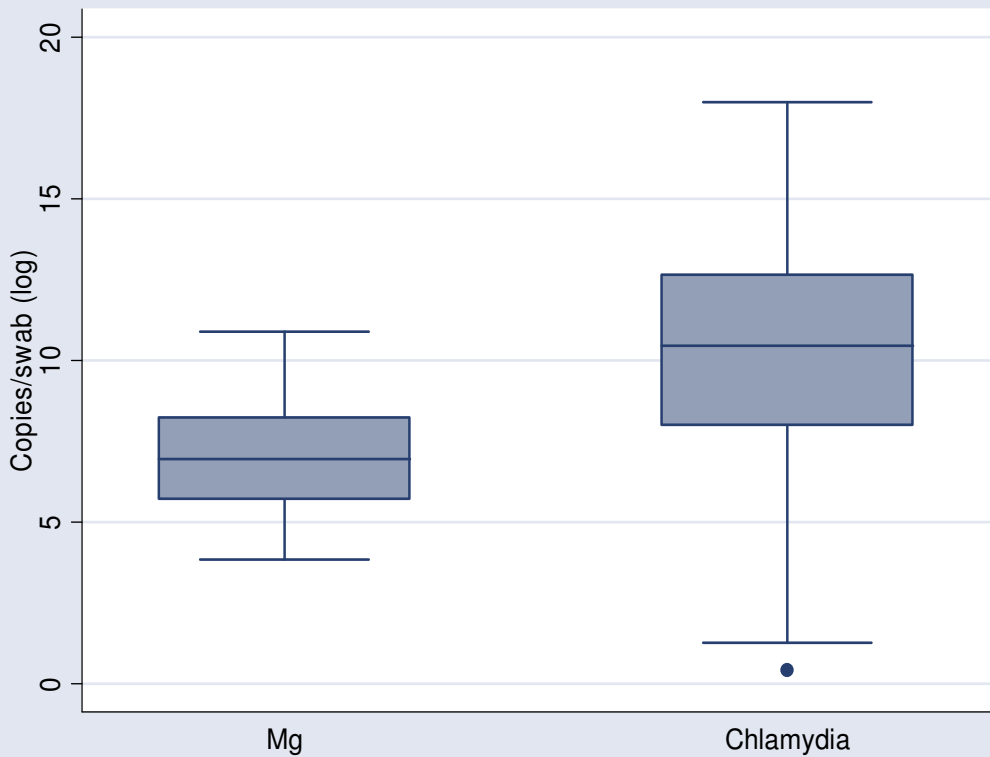

Supplement: MOESM1 [file 9443094]
